# Supplementary material
Source: PubMed Central journal article supplement (PMC10074976)
Supplement: mmc1.pdf [file mmc1.pdf]

# Supplementary Data 1

## Figure 5A Raw data

|                          | Sample No. | LUC     | REN      | LUC/REN ratio |
|--------------------------|------------|---------|----------|---------------|
| pRc/CMV                  | 1          | 523494  | 9449607  | 0.05539849    |
|                          | 2          | 607754  | 11019331 | 0.05515344    |
|                          | 3          | 582346  | 10466855 | 0.05563715    |
| pRc/CMV<br>CBF $\beta$   | 4          | 705486  | 10493770 | 0.06722903    |
|                          | 5          | 720143  | 12008225 | 0.05997081    |
|                          | 6          | 735368  | 10813334 | 0.06800567    |
| pRc/CMV<br>RUNX1         | 7          | 948755  | 11161955 | 0.08499900    |
|                          | 8          | 998612  | 12102578 | 0.08251234    |
|                          | 9          | 1084477 | 13119345 | 0.08266243    |
| pRc/CMV<br>R174Q         | 10         | 167557  | 5925823  | 0.02827573    |
|                          | 11         | 145387  | 5182322  | 0.02805441    |
|                          | 12         | 199403  | 6060926  | 0.03289976    |
| pRc/CMV<br>RUNX1-ETO     | 13         | 57911   | 4095586  | 0.01413986    |
|                          | 14         | 79885   | 5250430  | 0.01521494    |
|                          | 15         | 65624   | 4033175  | 0.01627105    |
| RUNX1<br>CBF $\beta$     | 16         | 443620  | 3626154  | 0.12233899    |
|                          | 17         | 443706  | 3287601  | 0.13496346    |
|                          | 18         | 450323  | 3734077  | 0.12059821    |
| R174Q<br>CBF $\beta$     | 19         | 34525   | 571566   | 0.06040422    |
|                          | 20         | 36162   | 598669   | 0.06040400    |
|                          | 21         | 34142   | 768756   | 0.04441201    |
| RUNX1-ETO<br>CBF $\beta$ | 22         | 12255   | 867797   | 0.01412197    |
|                          | 23         | 11267   | 795770   | 0.01415861    |
|                          | 24         | 11702   | 982927   | 0.01190526    |

## Figure 5C Raw data

|                                  | Sample No. | LUC     | REN      | LUC/REN Ratio |
|----------------------------------|------------|---------|----------|---------------|
| C11orf21 WT<br>-                 | 1          | 1642000 | 13819414 | 0.11881835    |
|                                  | 2          | 1400709 | 12514240 | 0.11192921    |
|                                  | 3          | 1346775 | 11625150 | 0.11585012    |
| C11orf21 WT<br>RUNX1+CBF $\beta$ | 4          | 4624304 | 24583468 | 0.18810625    |
|                                  | 5          | 4253601 | 22469390 | 0.18930647    |
|                                  | 6          | 4337737 | 22848950 | 0.18984404    |
| C11ORF21 mt<br>-                 | 7          | 204247  | 7684204  | 0.02658011    |
|                                  | 8          | 200615  | 8501456  | 0.02359772    |
|                                  | 9          | 263817  | 8832382  | 0.02986929    |
| C11orf21 mt<br>RUNX1+CBF $\beta$ | 10         | 3176649 | 25503564 | 0.12455706    |
|                                  | 11         | 3430077 | 26424808 | 0.12980518    |
|                                  | 12         | 3095009 | 24482486 | 0.12641727    |

# Supplementary Data 2

## Figure 6A Raw data

|                                                       | Sample No. | LUC     | REN      | LUC/REN ratio |
|-------------------------------------------------------|------------|---------|----------|---------------|
| pRC/CMV<br>pcDNA3.1(-)                                | 1          | 586325  | 22812888 | 0.02570148    |
|                                                       | 2          | 686644  | 24253466 | 0.02831117    |
|                                                       | 3          | 621341  | 23013668 | 0.02699878    |
| RUNX1<br>CBF $\beta$<br>pcDNA3.1(-)                   | 4          | 5922449 | 45435496 | 0.13034851    |
|                                                       | 5          | 6558728 | 45860528 | 0.14301466    |
|                                                       | 6          | 6085471 | 45326276 | 0.13425923    |
| RUNX1<br>CBF $\beta$<br>RUNX1-ETO (1+)<br>pcDNA3.1(-) | 7          | 816049  | 34293912 | 0.02379574    |
|                                                       | 8          | 847226  | 34002556 | 0.02491654    |
|                                                       | 9          | 996683  | 38251532 | 0.02605603    |
| RUNX1<br>CBF $\beta$<br>RUNX1-ETO (2+)                | 10         | 609591  | 31683952 | 0.01923974    |
|                                                       | 11         | 701338  | 34994684 | 0.02004127    |
|                                                       | 12         | 624362  | 32817908 | 0.01902504    |

## Figure 6B Raw data

|                      | Sample No. | LUC | REN  | LUC/REN ratio |
|----------------------|------------|-----|------|---------------|
| Control              | 1          | 141 | 7064 | 0.019960      |
|                      | 2          | 149 | 9121 | 0.016336      |
|                      | 3          | 150 | 6560 | 0.022866      |
| RUNX1<br>CBF $\beta$ | 4          | 142 | 2182 | 0.065077      |
|                      | 5          | 121 | 2111 | 0.057319      |
|                      | 6          | 143 | 2193 | 0.065207      |

## Figure 6C Raw data

|         | Sample No. | LUC     | REN      | LUC/REN ratio |
|---------|------------|---------|----------|---------------|
| pRC/CMV | 1          | 2435730 | 19469572 | 0.12510445    |
|         | 2          | 2432844 | 19833382 | 0.12266410    |
|         | 3          | 2392651 | 19387130 | 0.12341440    |
| RUNX1   | 4          | 5654425 | 30837828 | 0.18336003    |
|         | 5          | 5614333 | 30899010 | 0.18169945    |
|         | 6          | 5681955 | 31469188 | 0.18055614    |
| RUNX2   | 7          | 4456763 | 19176036 | 0.23241315    |
|         | 8          | 4592261 | 20185322 | 0.22750497    |
|         | 9          | 4295445 | 20145390 | 0.21322223    |
| RUNX3   | 10         | 5181372 | 28911434 | 0.17921532    |
|         | 11         | 5672885 | 30694420 | 0.18481812    |
|         | 12         | 5849196 | 30817036 | 0.18980398    |
